# Supplementary material for: Respiratory impairments in patients suffering from Fabry disease – A cross-sectional study
Source: PubMed Central journal article supplement — Chron Respir Dis. 2024 Feb 9;21:14799731231221821. doi: 10.1177/14799731231221821 (PMC10858660; doi:10.1177/14799731231221821), 2024-02-09
Supplement: sj-pdf-1-crd-10.1177_14799731231221821.pdf [file sj-pdf-1-crd-10.1177_14799731231221821.pdf]

## Supplementary material

**Supplementary Table 1: The Mainz Severity Score Index, a clinical scoring system used to determine the severity of the signs and symptoms of Fabry disease**

| <b>General score</b>                              |                           |              | <b>Neurological score</b>       |                               |              |
|---------------------------------------------------|---------------------------|--------------|---------------------------------|-------------------------------|--------------|
| <b>Sign/symptom</b>                               | <b>Rating</b>             | <b>Score</b> | <b>Sign/symptom</b>             | <b>Rating</b>                 | <b>Score</b> |
| Characteristic facial appearance                  | No                        | 0            | Tinnitus                        | No                            | 0            |
|                                                   | Yes                       | 1            |                                 | Mild                          | 1            |
| Angiokeratoma                                     | None                      | 0            |                                 | Severe                        | 2            |
|                                                   | Some                      | 1            | Vertigo                         | No                            | 0            |
|                                                   | Extensive                 | 2            |                                 | Mild                          | 1            |
| Oedema                                            | No                        | 0            |                                 | Severe                        | 2            |
|                                                   | Yes                       | 1            | Acroparaesthesia                | No                            | 0            |
| Musculoskeletal                                   | No                        | 0            |                                 | Occasional                    | 3            |
|                                                   | Yes                       | 1            |                                 | Chronic                       | 6            |
| Cornea verticillata                               | No                        | 0            | Fever pain crisis               | No                            | 0            |
|                                                   | Yes                       | 1            |                                 | Yes                           | 2            |
| Diaphoresis                                       | Normal                    | 0            | Cerebrovascular                 | No                            | 0            |
|                                                   | Hypo/hyper                | 1            |                                 | Ischaemic lesions (in MRI/CT) | 1            |
|                                                   | Anhidrosis                | 2            |                                 | TIA/migraine etc.             | 3            |
| Abdominal pain                                    | No                        | 0            |                                 | Stroke                        | 5            |
|                                                   | Yes                       | 2            | <b>Psychiatric/psychosocial</b> |                               |              |
| Diarrhoea/constipation                            | No                        | 0            | Depression                      | No                            | 0            |
|                                                   | Yes                       | 1            |                                 | Yes                           | 1            |
| Haemorrhoids                                      | No                        | 0            | Fatigue                         | No                            | 0            |
|                                                   | Yes                       | 1            |                                 | Yes                           | 1            |
| Pulmonary                                         | No                        | 0            | Reduced activity level          | No                            | 0            |
|                                                   | Yes                       | 2            |                                 | Yes                           | 1            |
| New York Heart Association (NYHA) classification* | No                        | 0            |                                 |                               |              |
|                                                   | Class I                   | 1            |                                 |                               |              |
|                                                   | Class II                  | 2            |                                 |                               |              |
|                                                   | Class III                 | 3            |                                 |                               |              |
|                                                   | Class IV                  | 4            |                                 |                               |              |
| <b>Maximum score</b>                              |                           | <b>18</b>    | <b>Maximum score</b>            |                               | <b>20</b>    |
| <b>Cardiovascular score</b>                       |                           |              | <b>Renal score</b>              |                               |              |
| Changes in cardiac muscle thickness               | No                        | 0            | Evidence of renal dysfunction   | No proteinuria                | 0            |
|                                                   | Thickening of wall/septum | 1            |                                 | Proteinuria                   | 4            |
|                                                   | LVH seen on ECG           | 6            |                                 | Tubular dysfunction/low       | 8            |

|                      |                                 |           |                                                               |           |
|----------------------|---------------------------------|-----------|---------------------------------------------------------------|-----------|
|                      | Cardiomyopathy (< 15 mm)        | 8         | GFR or creatinine clearance                                   |           |
|                      | Severe cardiomyopathy (> 15 mm) | 12        | End-stage renal failure (serum creatinine levels > 3.5 mg/dl) | 12        |
| Valve insufficiency  | No                              | 0         | Dialysis                                                      | 18        |
|                      | Yes                             | 1         |                                                               |           |
| ECG abnormalities    | No                              | 0         |                                                               |           |
|                      | Yes                             | 2         |                                                               |           |
| Pacemaker            | No                              | 0         |                                                               |           |
|                      | Yes                             | 4         |                                                               |           |
| Hypertension         | No                              | 0         |                                                               |           |
|                      | Yes                             | 1         |                                                               |           |
| <b>Maximum score</b> |                                 | <b>20</b> | <b>Maximum score</b>                                          | <b>18</b> |

\*Limitation on physical activity: Class I, none. Ordinary physical activity does not cause undue fatigue, palpitation, dyspnea, or anginal pain but shows heart involvement in the echocardiogram; Class II, slight. Comfortable at rest, but ordinary physical activity results in fatigue. Class III, marked. Comfortable at rest, but less than ordinary physical activity causes fatigue; Class IV, unable to carry out any physical activity without discomfort. Symptoms of cardiac insufficiency or of anginal syndrome may be present even at rest. Physical activity increases discomfort. MRI, magnetic resonance imaging; CT, computed tomography; TIA, transient ischemic attack; LVH, left ventricular hypertrophy; ECG, electrocardiography; GFR, glomerular filtration rate.

**Supplementary Table 2: *GLA* gene pathogenic variants and  $\alpha$ -galactosidase A enzyme activity at time of diagnosis in the National Danish Fabry Cohort**

| Amino acid change                                                          |       | Nucleotide change            |  | Phenotype                     | n = 86  |
|----------------------------------------------------------------------------|-------|------------------------------|--|-------------------------------|---------|
| <b>Missense</b>                                                            |       |                              |  |                               |         |
| p.Gly85Asp                                                                 | G85D  | c.254G>A                     |  | Classic                       | 19 (22) |
| p.Arg112Cys                                                                | R112C | c.334C>T                     |  | Classic                       | 13 (15) |
| p.Ala156Thr                                                                | A156T | c.466G>A                     |  | Classic                       | 12 (14) |
| p.Asn34Ser                                                                 | N34S  | c.101A>G                     |  | Classic                       | 8 (9)   |
| p.Ile232Thr                                                                | I232T | c.695T>C                     |  | Likely classic                | 6 (7)   |
| p.Gly271Ser                                                                | G271S | c.811G>A                     |  | Classic                       | 4 (5)   |
| p.Asn355Lys                                                                | N355K | c.1065C>A                    |  | Classic                       | 2 (2)   |
| p.Gly261Asp                                                                | G261D | c.782G>A                     |  | Classic                       | 2 (2)   |
| p.Ser297Phe                                                                | S297F | c.890C>T                     |  | Classic                       | 2 (2)   |
| p.Trp236Cys                                                                | W236C | c.708G>C                     |  | Classic                       | 2 (2)   |
| p.Gly171Ser                                                                | G171S | c.511G>A                     |  | Late-onset                    | 2 (2)   |
| p.Ile317Thr                                                                | I317T | c.950T>C                     |  | Classic                       | 1 (1)   |
| p.Ser276Asn                                                                | S276N | c.827G>A                     |  | Classic                       | 1 (1)   |
| <b>Nonsense</b>                                                            |       |                              |  |                               |         |
| p.Arg342Ter                                                                | R342* | c.1024C>T                    |  | Classic                       | 3 (3)   |
| p.Arg227Ter                                                                | R227* | c.679C>T                     |  | Classic                       | 2 (2)   |
| p.Arg301Ter                                                                | R301* | c.901C>T                     |  | Classic                       | 1 (1)   |
| <b>Other</b>                                                               |       |                              |  |                               |         |
| p.Phe295Leufs*22<br>Deletion-frameshift                                    |       | c.885del                     |  | Not investigated <sup>x</sup> | 3 (3)   |
| Deletion-insertion                                                         |       | c.369+3_c.547+954del4096insT |  | Classic                       | 1 (1)   |
| Large_del                                                                  |       | c.999+1del                   |  | Not investigated <sup>x</sup> | 1 (1)   |
| Splice site deletion<br>exon 6 skipping                                    |       | c.195-? 801 + ?del           |  | Not investigated <sup>x</sup> | 1 (1)   |
| <b><math>\alpha</math>-galactosidase A (nmol/h/mg protein)<sup>y</sup></b> |       |                              |  |                               |         |
| Female                                                                     |       | 11 [1.6 – 19]                |  |                               |         |
| Male                                                                       |       | 1.7 [0.3 – 11]               |  |                               |         |

Frequency (%) or median [range].

n, number of patients; not investigated<sup>x</sup>, no available data in the International Fabry Disease Genotype-Phenotype Database (dbFGP) (<http://dbfgp.org/dbFgp/fabry/>) nor in the <http://fabry-database.org>; <sup>y</sup>, measured in leucocytes, reference range: 20-65 nmol/h/mg protein.

**Supplementary table 3: A summary of cohort studies on pulmonary involvement in Fabry disease in chronological order**

| Authors, year of publ. and ref. no. | No. of patients           | Methods                                                                                                              | Control group | Follow-up | Outcome                                                                                                                                                                                                                                                             |
|-------------------------------------|---------------------------|----------------------------------------------------------------------------------------------------------------------|---------------|-----------|---------------------------------------------------------------------------------------------------------------------------------------------------------------------------------------------------------------------------------------------------------------------|
| Bartimmo et. al., 1972 (17)         | 3 males                   | Spirometry, Chest x-ray, smoking history (pack-years), biochemistry and pulmonary scintigraphy                       | No            | No        | No clinical or laboratory evidence of primary pulmonary dysfunction. No pulmonary dysfunction in 1 out of 3 patients. Pulmonary abnormalities present in 2 out of 3 patients were related to prior illnesses such as pectus excavatum and left ventricular failure. |
| Brown et. al., 1997 (18)            | 25 males                  | Spirometry, smoking history, biochemistry, chest x-ray, methacholine challenge testing, and radionuclide scan        | No            | No        | 36% had dyspnoea and 24% had cough and/or wheezing. 36% had airway obstruction primarily associated with age and dyspnoea or wheezing, weakly associated with smoking.                                                                                              |
| Rosenberg et. al., 2000 (15)        | 7 (6 males, 1 female)     | Spirometry, chest x-ray, smoking history (pack-years), biochemistry, bronchoscopy and ventilation and perfusion scan | No            | No        | All patients had airway obstruction, worse in patients who smoked. Bronchoscopy showed that airway epithelial cells contained inclusion bodies.                                                                                                                     |
| Bierer et. al., 2005 (19)           | 39 (15 males, 24 females) | Spirometry, ECG, non-invasive cardiopulmonary exercise test and echocardiogram                                       | Yes           | No        | 18 out of 39 Fabry patients (46%) had significant decrease in diastolic blood pressure during exercise. None of the control patients had a significant decrease in diastolic                                                                                        |

|                           |                                    |                                                                                                                                          |                                                                 |                                                                                  |                                                                                                                                                                                                                                                                  |
|---------------------------|------------------------------------|------------------------------------------------------------------------------------------------------------------------------------------|-----------------------------------------------------------------|----------------------------------------------------------------------------------|------------------------------------------------------------------------------------------------------------------------------------------------------------------------------------------------------------------------------------------------------------------|
|                           |                                    |                                                                                                                                          |                                                                 |                                                                                  | blood pressure during exercise.                                                                                                                                                                                                                                  |
| Bierer et. al., 2006 (20) | 21 (6 in RCT)                      | Spirometry, ECG, cardiopulmonary exercise test and physical examination                                                                  | 6 patients were randomized 2:1 to receive either placebo or ERT | Cardiopulmonary exercise test every 3 months over a period of at least 18 months | 3 patients had mild airway obstruction, 1 had severe airway obstruction, 2 had decreased FVC and 1 had restrictive ventilatory defect. None had a diffusion capacity less than 75%. Patients receiving ERT compared to placebo had increased exercise tolerance. |
| Aubert et. al., 2006 (21) | 67 (from the Fabry Outcome Survey) | Spirometry and smoking history (active, past, or never smokers)                                                                          | No                                                              | No                                                                               | 23 out of 67 patients (34%) had airway obstruction, exceeding the prevalence in the general adult population.                                                                                                                                                    |
| Magage et. al., 2007 (22) | 50                                 | Spirometry and bronchodilatory test.                                                                                                     | Yes                                                             | 39 were longitudinal follow-ups over a period of 24 months                       | 61% of males and 26% of females had mild to severe airway obstruction. Significant age-dependent reduction in %FVC and %FEV <sub>1</sub> in males. In both males and females %FEF <sub>25-75</sub> decreased by similar degree.                                  |
| Wang et. al., 2007 (23)   | 44 females                         | Spirometry, ECG, non-invasive exercise test, biochemistry, cerebral MRI and questionnaire on symptoms, pain, and quality of daily living | No                                                              | No                                                                               | All patients had reduced quality of life. Cardiopulmonary, renal system and central/peripheral nervous manifestations for Fabry disease were present far above predicted for random X-inactivation of the normal allele.                                         |
| Sorbello et.              | 2 males                            | Spirometry and 3-                                                                                                                        | No                                                              | Respectively at 52                                                               | Standard                                                                                                                                                                                                                                                         |

|                                 |                           |                                                                                                                |     |                      |                                                                                                                                                                                                                                                                                                                              |
|---------------------------------|---------------------------|----------------------------------------------------------------------------------------------------------------|-----|----------------------|------------------------------------------------------------------------------------------------------------------------------------------------------------------------------------------------------------------------------------------------------------------------------------------------------------------------------|
| al., 2008<br>(24)               |                           | lead ECG in connection with anaesthesia                                                                        |     | months and 13 months | anaesthesiological protocol for kidney transplant was used. Both patients had uneventful awakening after uncomplicated surgery and restored renal function on day 2 and 3 posttransplant with no need for dialysis.                                                                                                          |
| Havndrup et. al., 2010<br>(25)  | 3 probands                | Spirometry, ECG, echocardiogram, and genetic analysis                                                          | No  | No                   | Genetic testing is needed in females to diagnose Fabry disease, as they can have normal measured enzyme activity. Enzyme measurements in males are sufficient to diagnose Fabry disease, as they have severely reduced or almost absent enzyme activity.                                                                     |
| Koskenvuo et. al., 2010<br>(26) | 17 (6 males, 11 females)  | Spirometry, ECG, bicycle stress test, pulmonary HRTC, cardiac MRI, and questionnaire on lifestyle and symptoms | No  | No                   | LVH and reduced exercise capacity were the most apparent cardiac changes, with little association to cardiopulmonary symptoms. Spirometry showed small reduction in vital capacity and FEV <sub>1</sub> . Slightly morphological pulmonary changes detected by HRTC, were not associated with changes in pulmonary function. |
| Duning et. al., 2013 (3)        | 23 (12 males, 11 females) | Echocardiogram, cerebral MRI, polysomnography, and electro-neurography                                         | Yes | No                   | 5 out of 23 patients had CSA-CSR. The severity of central sleep apnoea correlated with the severity of structural brainstem                                                                                                                                                                                                  |

|                            |                           |                                                                                                                                              |     |                                                                    |                                                                                                                                                                                                                           |
|----------------------------|---------------------------|----------------------------------------------------------------------------------------------------------------------------------------------|-----|--------------------------------------------------------------------|---------------------------------------------------------------------------------------------------------------------------------------------------------------------------------------------------------------------------|
|                            |                           |                                                                                                                                              |     |                                                                    | damage. Fabry disease patients had widespread structural changes compared to healthy controls.                                                                                                                            |
| Odler et. al., 2015 (27)   | 7 patients and 4 carriers | Pulmonary function test, ECG, biochemistry, smoking history, chest X-ray, physical examination, and questionnaire about respiratory symptoms | Yes | 5 patients on ERT had an average longitudinal follow-up of 5 years | Mild symptoms related to non-reversible obstructive ventilatory lung disorder. Follow-up showed stabilization of airway obstruction using ERT in 4 out of 5 patients.                                                     |
| Franzen et. al., 2015 (5)  | 52 (17 males, 35 females) | Respiratory polygraphy, questionnaire about sleep propensity, echocardiogram, biochemistry, and PHQ-9                                        | No  | No                                                                 | Sleep-disordered breathing, especially obstructive sleep apnoea, is highly prevalent in Fabry patients. Excessive daytime sleepiness is related with depression rather than sleep-disordered breathing in Fabry patients. |
| Franzen et. al., 2017 (28) | 95                        | Pulmonary function test and smoking history (pack-years)                                                                                     | No  | Yearly pulmonary function test from 1999 to 2015                   | 46% had bronchial obstruction with age, smoking and male sex as significant predictors. FEV <sub>1</sub> declined significantly in males and patients receiving ERT.                                                      |
| Franzen et. al., 2018 (4)  | 53                        | Pulmonary function test, smoking history (pack-years), and biochemistry                                                                      | No  | Yearly pulmonary function test from 1999 to 2015                   | The greatest decrease of FEV <sub>1</sub> /FVC z-score was observed in classic males compared with later-onset males and later-onset females. After initiation of ERT the FEV <sub>1</sub> /FVC z-                        |

---

score decrease was significantly reduced. Late ERT initiation and smoking were independently associated with faster FEV<sub>1</sub> decline.

---

ECG, electrocardiogram; ERT, enzyme replacement therapy; FVC, forced vital capacity; FEV<sub>1</sub>, forced expiratory volume in the first-second; FEF<sub>25-75</sub>, forced expiratory flow at 25 and 75% of the pulmonary volume; MRI, magnetic resonance imaging; HRCT, high-resolution CT; LVH, left ventricular hypertrophy; CSA-CSR, central sleep apnoea with Cheyne-Stokes respiration; PHQ-9, patient health questionnaire-9 for depression; FEV<sub>1</sub>/FVC ratio, forced expiratory volume in the first-second divided by forced vital capacity.
